# Supplementary material for: Acute ketamine dysregulates task-related gamma-band oscillations in thalamo-cortical circuits in schizophrenia
Source: PubMed Central journal article supplement (PMC6061682; doi:10.1093/brain/awy175), 2018-07-17

**SI-Table 1.** Node-node pairs with significant effects in Granger Causality (GC) estimates for LOWFREQ (5-28 Hz) and HIGHFREQ (63-80 Hz) activity, separately for CONDITION effect (KETAMINE vs. PLACEBO) or GROUP effects (ScZ/FEP vs. CONTROLS)

|                                                   |                                                                                                                                                                                       | Sign GC connections | t-values     | p-values         |
|---------------------------------------------------|---------------------------------------------------------------------------------------------------------------------------------------------------------------------------------------|---------------------|--------------|------------------|
| <b>KETAMINE vs. PLACEBO (n=14)</b>                |                                                                                                                                                                                       |                     |              |                  |
| <b>LOWFREQ (5-28 Hz)</b>                          |                                                                                                                                                                                       |                     |              |                  |
| Thalamo-cortical Feedforward<br>DAI: 0.54-0.83    | RPCUN-RTHA, LPCG-RTHA, LPCUN-LTHA                                                                                                                                                     |                     | -2.2 to -2.9 | 0.0211 to 0.0132 |
| Thalamo-cortical Feedback<br>DAI: -0.49           | RTHA-RIOG                                                                                                                                                                             |                     | -3.4         | 0.0001           |
| Cortico-cortical Feedforward<br>DAI: 0.17-0.68    | LLING-RIOG, LCUN-LCAL, LPCG-RIOG, LSOG-LLING,<br>LSOG-LCAL, LIOG-RIOG                                                                                                                 |                     | -2.0 to -3.0 | 0.0226 to 0.0074 |
| Cortico-cortical Feedback<br>DAI:                 | LMOG-RCUN, LMOG-RPCUN, LSOG-LCUN, LCAL-LCUN,<br>LMOG-RLING, RIOG-LPCUN, LPCUN-RSOG, LMOG-RCAL,<br>LIOG-LCAL, LMOG-RSOG, RLING-LCUN, RIOG-LSOG,<br>LMOG-RPCG, RSOG-RCUN                |                     | -2.0 to -3.3 | 0.0271 to 0.0001 |
| <b>HIGHFREQ (63-80 Hz)</b>                        |                                                                                                                                                                                       |                     |              |                  |
| Thalamo-cortical Feedforward<br>DAI: 0.95         | RCAL-LTHA                                                                                                                                                                             |                     | 2.5          | 0.0198           |
| Thalamo-cortical Feedback<br>DAI: -0.68           | RTHA-RPCUN                                                                                                                                                                            |                     | 2.8          | 0.0130           |
| Cortico-cortical Feedforward<br>DAI: 0.42 to 0.86 | LSOG-LPCUN, LLING-LPCUN, LIOG-LPCUN                                                                                                                                                   |                     | -2.0 to -2.2 | 0.0213 to 0.0031 |
| Cortico-cortical Feedback<br>DAI: -0.16           | RIOG-LMOG                                                                                                                                                                             |                     | -2.2         | 0.0054           |
| <b>FIRST-EPIISODE vs. CONTROLS (n=10)</b>         |                                                                                                                                                                                       |                     |              |                  |
| <b>HIGHFREQ (63-80 Hz)</b>                        |                                                                                                                                                                                       |                     |              |                  |
| Thalamo-cortical Feedback<br>DAI: 0.18            | LMOG-RTHA                                                                                                                                                                             |                     | 2.8          | 0.0062           |
| Cortico-cortical Feedforward<br>DAI: 0.06 to 0.74 | RSOG-LPCG, RSOG-LIOG                                                                                                                                                                  |                     | 2.5 to 3.2   | 0.0077 to 0.0043 |
| Cortico-cortical Feedback<br>DAI: -0.64           | RMOG-RPCUN                                                                                                                                                                            |                     | 3.0          | 0.0074           |
| <b>SCHIZOPHRENIA vs. CONTROLS (n=16)</b>          |                                                                                                                                                                                       |                     |              |                  |
| <b>LOWFREQ (5-28 Hz)</b>                          |                                                                                                                                                                                       |                     |              |                  |
| Thalamo-cortical Feedforward<br>DAI: 0.60         | LPCUN-LTHA, RPCUN-LTHA                                                                                                                                                                |                     | 2.3 to 2.9   | 0.0190 to 0.0030 |
| Cortico-cortical Feedforward<br>DAI: 0.01-0.17    | RPCG-RIOG, RPCG-LPCUN, RPCG-LMOG, LPCG-RPCUN                                                                                                                                          |                     | 2.2 to 2.5   | 0.0170 to 0.0100 |
| Cortico-cortical Feedback<br>DAI: -0.10 to -0.80  | LPCUN-RCUN, RPCUN-LMOG, RPCG-RCAL, RPCG-RMOG,<br>LPCG-RSOG, LPCUN-RMOG, LPCG-LCAL, LPCUN-RLING,<br>LPCUN-RCAL, LPCG-RIOG, LPCG-RLING, RPCG-RLING,<br>LLING-LCAL, LPCG-RCAL, LPCG-RMOG |                     | 2.3 to 3.7   | 0.0210 to 0.0010 |
| <b>HIGHFREQ (63-80 Hz)</b>                        |                                                                                                                                                                                       |                     |              |                  |
| Thalamo-cortical Feedforward<br>DAI: 0.50 to 0.81 | RPCG-RTHA, LPCUN-LTHA, RPCUN-LTHA, RPCG-LTHA                                                                                                                                          |                     | 2.2 to 2.4   | 0.0200 to 0.0070 |
| Thalamo-cortical Feedback<br>DAI: -0.93           | RTHA-RLING                                                                                                                                                                            |                     | 2.1          | 0.0180           |
| Cortico-cortical Feedforward<br>DAI: 0.22 to 0.42 | RPCG-LMOG, LPCG-RSOG                                                                                                                                                                  |                     | 2.3 to 2.4   | 0.0160 to 0.0080 |
| Cortico-cortical Feedback<br>DAI: -0.22 to -0.78  | RPCUN-RSOG, RPCG-LSOG, RPCG-LCUN, RPCUN-LMOG,<br>RPCG-LLING, LPCG-RSOG, LPCG-RCUN, LPCG-RLING,<br>RPCG-RLING, LPCG-RIOG                                                               |                     | 2.1 to 2.8   | 0.0250 to 0.0040 |

Abbreviations: CAL = calcarine sulcus, CUN = cuneus, LING = lingual gyrus, SOG = superior occipital gyrus, MOG = middle occipital gyrus, IOG = inferior occipital gyrus, PCG = posterior cingulate cortex, PCUN = precuneus, THA = thalamus. L = left hemisphere, R = right hemisphere. DAI = Directed Asymmetry Index (negative values represent predominantly feedback, whereas positive values indicate predominantly feedforward connectivity within the node-node pair).

**SI-Table 2.** Cohen's *d* effect sizes for group and condition comparisons

|                                                   | <b>KETAMINE vs<br/>PLACEBO</b> | <b>FIRST-EPIISODE<br/>vs CONTROLS</b> | <b>SCHIZOPHRENIA<br/>vs CONTROLS</b> |
|---------------------------------------------------|--------------------------------|---------------------------------------|--------------------------------------|
| <b>Oscillatory Power changes</b>                  |                                |                                       |                                      |
| <i>Occipital cortex: 63-80 / 53-76 / 62-83 Hz</i> | ↑ 0.88                         | ↓ 1.49                                | ↓ 1.07                               |
| <i>Occipital cortex: 5-28 / 7-23 Hz</i>           | ↑ 1.12                         | –                                     | ↑ 1.06                               |
| <i>Left Thalamus: 6-20 / 7-20 Hz</i>              | ↑ 1.31                         | –                                     | ↑ 1.07                               |
| <i>Right Thalamus: 6-30 / 8-20 Hz</i>             | ↑ 0.99                         | –                                     | ↑ 1.02                               |
| <b>GC connectivity changes</b>                    |                                |                                       |                                      |
| LOWFREQ (5-28 Hz)                                 |                                |                                       |                                      |
| <i>Thalamo-cortical feedforward</i>               | ↓ 0.81                         | –                                     | ↑ 0.98                               |
| <i>Thalamo-cortical feedback</i>                  | ↓ 0.90                         | –                                     | –                                    |
| <i>Cortico-cortical feedforward</i>               | ↓ 1.33                         | –                                     | ↑ 1.10                               |
| <i>Cortico-cortical feedback</i>                  | ↓ 1.06                         | –                                     | ↑ 1.22                               |
| HIGHFREQ (63-80 Hz)                               |                                |                                       |                                      |
| <i>Thalamo-cortical feedforward</i>               | ↑ 0.77                         | –                                     | ↑ 0.91                               |
| <i>Thalamo-cortical feedback</i>                  | ↑ 0.68                         | ↑ 1.26                                | ↑ 0.74                               |
| <i>Cortico-cortical feedforward</i>               | ↓ 0.81                         | ↑ 1.38                                | ↑ 1.12                               |
| <i>Cortico-cortical feedback</i>                  | ↓ 0.59                         | ↑ 1.32                                | ↑ 0.91                               |

**SI-Table 3.** Pearson's Correlations between behavioral performance, psychopathology and neuronal changes in low- and high-frequency power and connectivity

|                                   | Behavior      |               | PANSS subscale item scores |              |               |               |               |       |       |
|-----------------------------------|---------------|---------------|----------------------------|--------------|---------------|---------------|---------------|-------|-------|
|                                   | mRT           | ACC           | NEG                        | EXC          | COG           | POS           | P3            | DEP   | TOT   |
| <b>KETAMINE vs PLACEBO</b>        |               |               |                            |              |               |               |               |       |       |
| (5-28 Hz) power ↑                 | 0.25          | 0.10          | 0.08                       | 0.16         | -0.11         | -0.03         | 0.17          | 0.21  | -0.05 |
| (63-80 Hz) power ↑                | 0.41          | <b>-0.55*</b> | 0.12                       | 0.05         | 0.52          | 0.21          | -0.05         | 0.02  | 0.23  |
| (5-28 Hz) GC-TC ↓                 | 0.23          | 0.42          | -0.04                      | 0.07         | 0.32          | 0.46          | -0.28         | 0.13  | -0.10 |
| (5-28 Hz) GC-CC ↓                 | 0.12          | 0.28          | -0.16                      | -0.05        | <b>-0.57*</b> | <b>-0.48*</b> | -0.44         | -0.08 | -0.42 |
| (63-80 Hz) GC-TC ↑                | -0.38         | -0.23         | -0.41                      | -0.38        | 0.01          | -0.16         | <b>-0.69*</b> | -0.28 | 0.36  |
| (63-80 Hz) GC-CC ↓                | 0.41          | -0.28         | 0.24                       | -0.23        | -0.36         | -0.44         | -0.28         | -0.27 | -0.15 |
| <b>FIRST-EPIISODE vs CONTROLS</b> |               |               |                            |              |               |               |               |       |       |
| (5-28 Hz) power (↑)               | 0.06          | 0.24          | 0.19                       | 0.26         | 0.36          | 0.43          | -0.13         | 0.03  | 0.39  |
| (63-80 Hz) power ↓                | <b>-0.77*</b> | 0.48          | 0.09                       | 0.29         | 0.39          | 0.12          | <b>-0.68*</b> | -0.38 | -0.36 |
| (63-80 Hz) GC-TC ↑                | <b>0.71*</b>  | -0.56         | -0.14                      | -0.09        | -0.12         | -0.40         | -0.32         | -0.25 | -0.31 |
| (63-80 Hz) GC-CC ↑                | <b>0.60*</b>  | -0.25         | 0.07                       | 0.11         | -0.06         | 0.23          | 0.07          | -0.02 | 0.09  |
| <b>SCHIZOPHRENIA vs CONTROLS</b>  |               |               |                            |              |               |               |               |       |       |
| (5-28 Hz) power ↑                 | -0.21         | <b>-0.56*</b> | 0.05                       | <b>0.55*</b> | 0.46          | 0.33          | 0.18          | 0.16  | 0.35  |
| (63-80 Hz) power ↓                | -0.22         | 0.46          | -0.12                      | -0.01        | -0.25         | 0.11          | 0.04          | 0.12  | -0.02 |
| (5-28 Hz) GC-TC ↑                 | -0.17         | <b>-0.53*</b> | -0.19                      | -0.03        | 0.21          | -0.05         | 0.01          | 0.20  | 0.11  |
| (5-28 Hz) GC-CC ↑                 | -0.30         | -0.43         | -0.08                      | -0.01        | 0.19          | -0.13         | -0.08         | 0.02  | -0.03 |
| (63-80 Hz) GC-TC ↑                | -0.45         | -0.30         | -0.23                      | -0.01        | 0.20          | 0.05          | 0.01          | 0.04  | -0.06 |
| (63-80 Hz) GC-CC ↑                | -0.40         | -0.10         | -0.04                      | 0.19         | 0.25          | -0.02         | -0.06         | 0.23  | 0.11  |

\* Pearson's *r* values with significant *p*-values below 0.05(bootstrapped corrected *n*=1000)

Abbreviations: GC-TC = Granger Causality mean values across significant Thalamo-Cortical node-node pairs, GC-CC = Granger Causality mean values across significant Cortical-Cortical node-node pairs, mRT = mean response times, ACC = accuracy (% correct responses), PANSS subscales: NEG = Negative, EXC = Excitement, COG = Cognitive, POS = Positive, P3 = Hallucinatory behavior (subitem of POS scale), DEP = Depression, TOT = Total scores.

**SI-Figure 1.** Significant Pearson's Correlations between behavioral performance, psychopathology and neuronal changes in low- and high-frequency power and connectivity

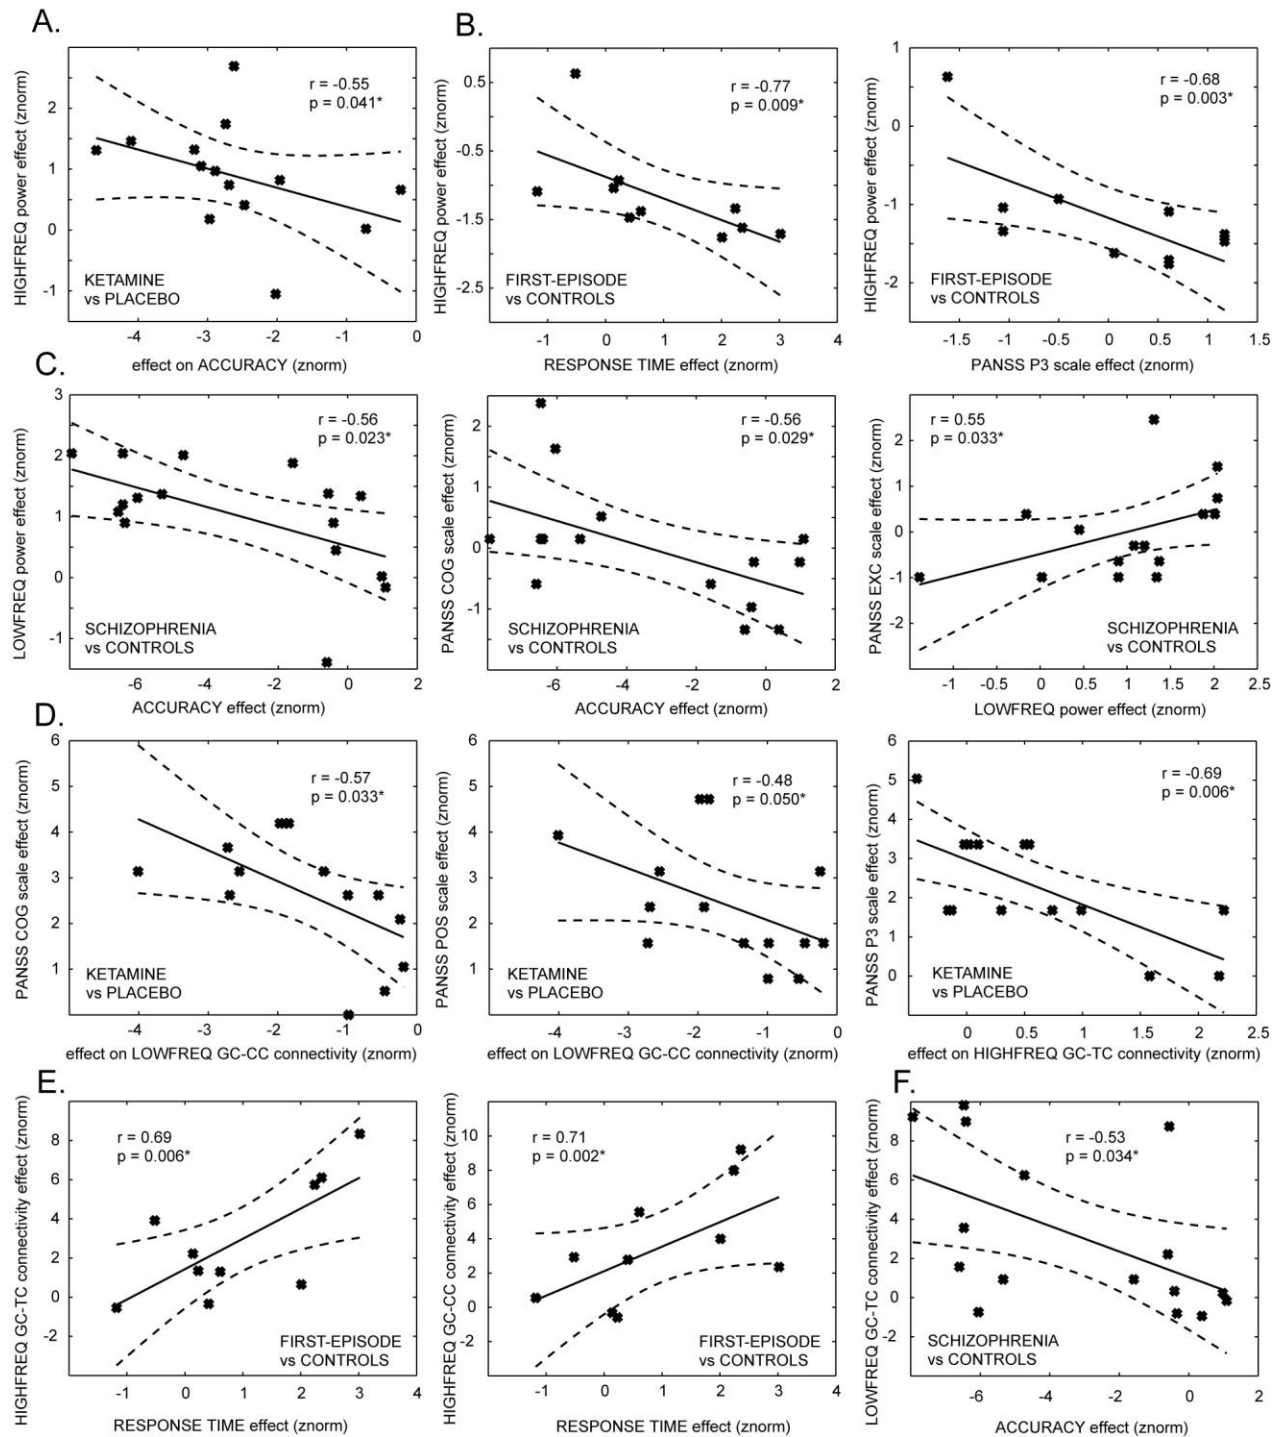

Supplement: awy175_brain-2017-02269-file010.pdf [file awy175_brain-2017-02269-file010.pdf]
